# Supplementary material for: Seroprevalence, Waning and Correlates of Anti-SARS-CoV-2 IgG Antibodies in Tyrol, Austria: Large-Scale Study of 35,193 Blood Donors Conducted between June 2020 and September 2021
Source: MDPI journal article supplement (doi:10.3390/v14030568), 2022-03-09
Supplement: s1 [file s1]

# Supplementary Material

## Supplementary Tables

**Table S1. STROBE checklist.**

|                          | Item No | Recommendation                                                                                                                                                                                    | Page No    |
|--------------------------|---------|---------------------------------------------------------------------------------------------------------------------------------------------------------------------------------------------------|------------|
| Title and abstract       | 1       | (a) Indicate the study’s design with a commonly used term in the title or the abstract                                                                                                            | 1          |
|                          |         | (b) Provide in the abstract an informative and balanced summary of what was done and what was found                                                                                               | 1          |
| Introduction             |         |                                                                                                                                                                                                   |            |
| Background/rationale     | 2       | Explain the scientific background and rationale for the investigation being reported                                                                                                              | 1-2        |
| Objectives               | 3       | State specific objectives, including any prespecified hypotheses                                                                                                                                  | 2          |
| Methods                  |         |                                                                                                                                                                                                   |            |
| Study design             | 4       | Present key elements of study design early in the paper                                                                                                                                           | 2-3        |
| Setting                  | 5       | Describe the setting, locations, and relevant dates, including periods of recruitment, exposure, follow-up, and data collection                                                                   | 2-3        |
| Participants             | 6       | (a) Give the eligibility criteria, and the sources and methods of selection of participants. Describe methods of follow-up                                                                        | 2          |
|                          |         | (b) For matched studies, give matching criteria and number of exposed and unexposed                                                                                                               | NA         |
| Variables                | 7       | Clearly define all outcomes, exposures, predictors, potential confounders, and effect modifiers. Give diagnostic criteria, if applicable                                                          | 2-3        |
| Data sources/measurement | 8*      | For each variable of interest, give sources of data and details of methods of assessment (measurement). Describe comparability of assessment methods if there is more than one group              | 2-3        |
| Bias                     | 9       | Describe any efforts to address potential sources of bias                                                                                                                                         | 3          |
| Study size               | 10      | Explain how the study size was arrived at                                                                                                                                                         | 2-3        |
| Quantitative variables   | 11      | Explain how quantitative variables were handled in the analyses. If applicable, describe which groupings were chosen and why                                                                      | 3          |
| Statistical methods      | 12      | (a) Describe all statistical methods, including those used to control for confounding                                                                                                             | 3          |
|                          |         | (b) Describe any methods used to examine subgroups and interactions                                                                                                                               | 3          |
|                          |         | (c) Explain how missing data were addressed                                                                                                                                                       | 3          |
|                          |         | (d) If applicable, explain how loss to follow-up was addressed                                                                                                                                    | NA         |
|                          |         | (e) Describe any sensitivity analyses                                                                                                                                                             | 3          |
| Results                  |         |                                                                                                                                                                                                   |            |
| Participants             | 13*     | (a) Report numbers of individuals at each stage of study—eg numbers potentially eligible, examined for eligibility, confirmed eligible, included in the study, completing follow-up, and analyzed | 3-9        |
|                          |         | (b) Give reasons for non-participation at each stage                                                                                                                                              | 3-9        |
|                          |         | (c) Consider use of a flow diagram                                                                                                                                                                | NA         |
| Descriptive data         | 14*     | (a) Give characteristics of study participants (eg demographic, clinical, social) and information on exposures and potential confounders                                                          | 3, Table 1 |
|                          |         | (b) Indicate number of participants with missing data for each variable                                                                                                                           | Table 1    |

|                          |     |                                                                                                                                                                                                              |         |
|--------------------------|-----|--------------------------------------------------------------------------------------------------------------------------------------------------------------------------------------------------------------|---------|
|                          |     | of interest                                                                                                                                                                                                  |         |
|                          |     | (c) Summarize follow-up time (eg, average and total amount)                                                                                                                                                  | Table 1 |
| Outcome data             | 15* | Report numbers of outcome events or summary measures over time                                                                                                                                               | 4-9     |
| Main results             | 16  | (a) Give unadjusted estimates and, if applicable, confounder-adjusted estimates and their precision (eg, 95% confidence interval). Make clear which confounders were adjusted for and why they were included | 4-9     |
|                          |     | (b) Report category boundaries when continuous variables were categorized                                                                                                                                    | 4-9     |
|                          |     | (c) If relevant, consider translating estimates of relative risk into absolute risk for a meaningful time period                                                                                             | NA      |
| Other analyses           | 17  | Report other analyses done—eg analyses of subgroups and interactions, and sensitivity analyses                                                                                                               | 5-9     |
| <b>Discussion</b>        |     |                                                                                                                                                                                                              |         |
| Key results              | 18  | Summarize key results with reference to study objectives                                                                                                                                                     | 9-10    |
| Limitations              | 19  | Discuss limitations of the study, taking into account sources of potential bias or imprecision. Discuss both direction and magnitude of any potential bias                                                   | 11      |
| Interpretation           | 20  | Give a cautious overall interpretation of results considering objectives, limitations, multiplicity of analyses, results from similar studies, and other relevant evidence                                   | 10-11   |
| Generalizability         | 21  | Discuss the generalizability (external validity) of the study results                                                                                                                                        | 10-11   |
| <b>Other information</b> |     |                                                                                                                                                                                                              |         |
| Funding                  | 22  | Give the source of funding and the role of the funders for the present study and, if applicable, for the original study on which the present article is based                                                | 12      |

**Table S2. Seroprevalences in all participants (principal analysis), in participants with repeated donations since October 2017, and in all participants with age- and sex-standardisation across the total population of Tyrol.**

| Month             | % seropositive (95% CI)     |                                                                                            |                                                                                                                 |
|-------------------|-----------------------------|--------------------------------------------------------------------------------------------|-----------------------------------------------------------------------------------------------------------------|
|                   | All participants (n=35,193) | Participants who had already donated blood leading up to the study <sup>a</sup> (n=21,361) | All participants (n=35,193) with age- and sex-standardisation across the total population of Tyrol <sup>b</sup> |
| <b>Anti-N IgG</b> |                             |                                                                                            |                                                                                                                 |
| June 2020         | 3.4 (2.8-4.2)               | 2.5 (2.0-3.3)                                                                              | 3.3 (2.6-4.0)                                                                                                   |
| July 2020         | 2.7 (2.1-3.4)               | 2.6 (1.9-3.4)                                                                              | 2.6 (2.0-3.3)                                                                                                   |
| October 2020      | 3.4 (2.9-4.0)               | 3.1 (2.5-3.7)                                                                              | 3.3 (2.7-3.9)                                                                                                   |
| November 2020     | 8.2 (7.3-9.1)               | 7.4 (6.4-8.5)                                                                              | 7.8 (6.9-8.7)                                                                                                   |
| December 2020     | 11.6 (10.6- 12.7)           | 11.4 (10.1-12.9)                                                                           | 11.2 (10.1-12.3)                                                                                                |
| January 2021      | 17.1 (16.0-18.3)            | 16.9 (15.5-18.4)                                                                           | 16.8 (15.7-18.0)                                                                                                |
| February 2021     | 15.2 (14.0-16.5)            | 16.5 (14.9-18.2)                                                                           | 15.3 (14.0-16.7)                                                                                                |
| March 2021        | 14.0 (13.0-15.1)            | 14.1 (12.9-15.5)                                                                           | 14.3 (13.5-15.2)                                                                                                |
| <b>Anti-S IgG</b> |                             |                                                                                            |                                                                                                                 |
| March 2021        | 29.9 (27.5-32.4)            | 29.4 (26.5-32.5)                                                                           | 29.1 (26.6-31.6)                                                                                                |
| April 2021        | 35.2 (33.5-37.0)            | 36.3 (34.2-38.5)                                                                           | 35.6 (33.7-37.5)                                                                                                |
| Mai 2021          | 49.4 (47.6-51.3)            | 55.1 (52.8-57.3)                                                                           | 52.2 (50.4-54.1)                                                                                                |
| June 2021         | 68.3 (66.8-69.8)            | 73.5 (71.6-75.3)                                                                           | 68.5 (67.0-70.1)                                                                                                |
| July 2021         | 75.9 (74.5-77.2)            | 79.9 (78.3-81.5)                                                                           | 76.0 (74.6-77.4)                                                                                                |
| August 2021       | 82.6 (81.2-83.9)            | 84.9 (83.2-86.4)                                                                           | 82.7 (81.4-84.0)                                                                                                |
| September 2021    | 82.7 (81.4-83.8)            | 84.4 (82.8-85.8)                                                                           | 82.6 (81.3-83.8)                                                                                                |

<sup>a</sup>To define this subgroup of the study population, the period from October 2017 to study baseline was considered. <sup>b</sup>Direct age- and sex standardisation was applied by using age (categories 18-30, >30-40, >40-50, >50-60, >60-70 years) and sex structured data of the population of the Federal State of Tyrol in Austria as standard population as of 1 January 2021 from the Statistik Austria. Seroprevalence estimates by age groups and sex are presented in Supplementary Figures.

## Supplementary Figures

**Figure S1. Symptoms and medical attendance of prior SARS-CoV-2 infections.**

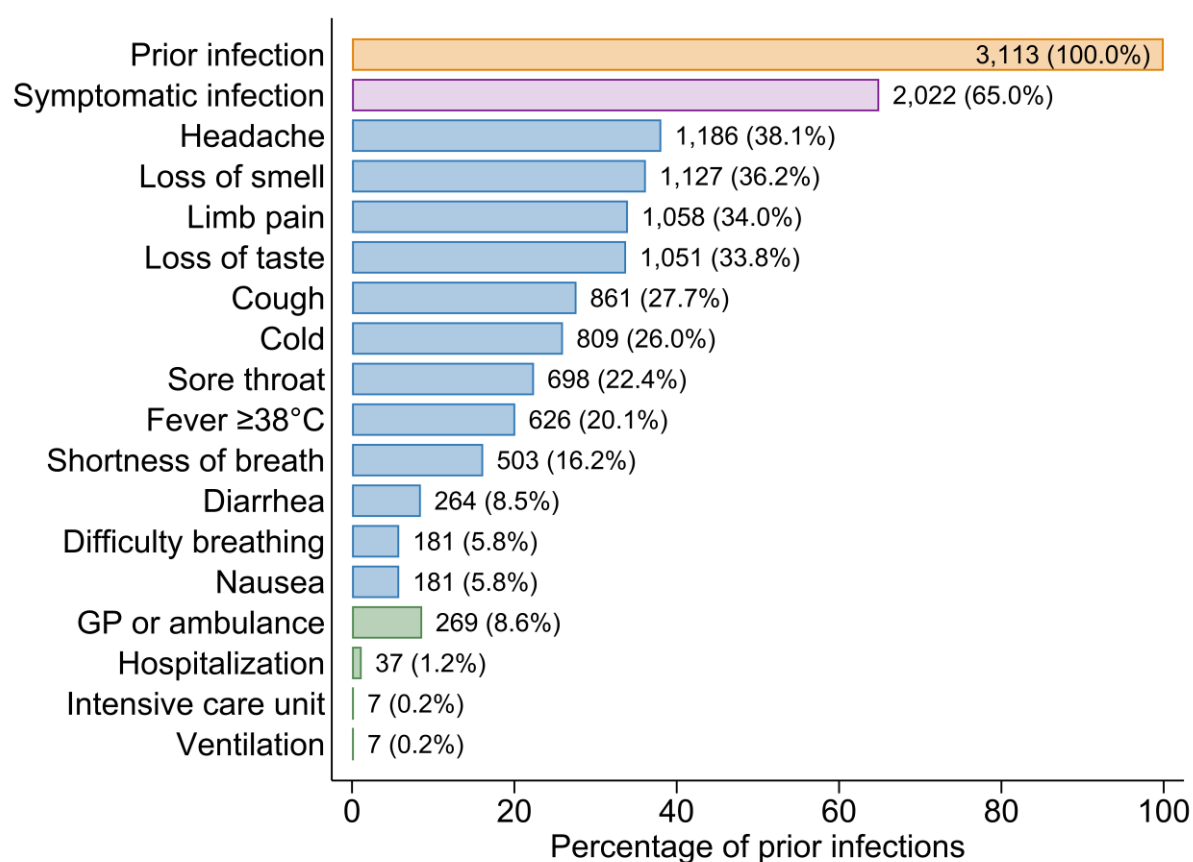

Abbreviations: GP, general practitioner.

**Figure S2. Seroprevalence of anti-SARS-CoV-2 IgG antibodies by sex and age group, Tyrol, Austria, June 2020-September 2021(n=35,193).**

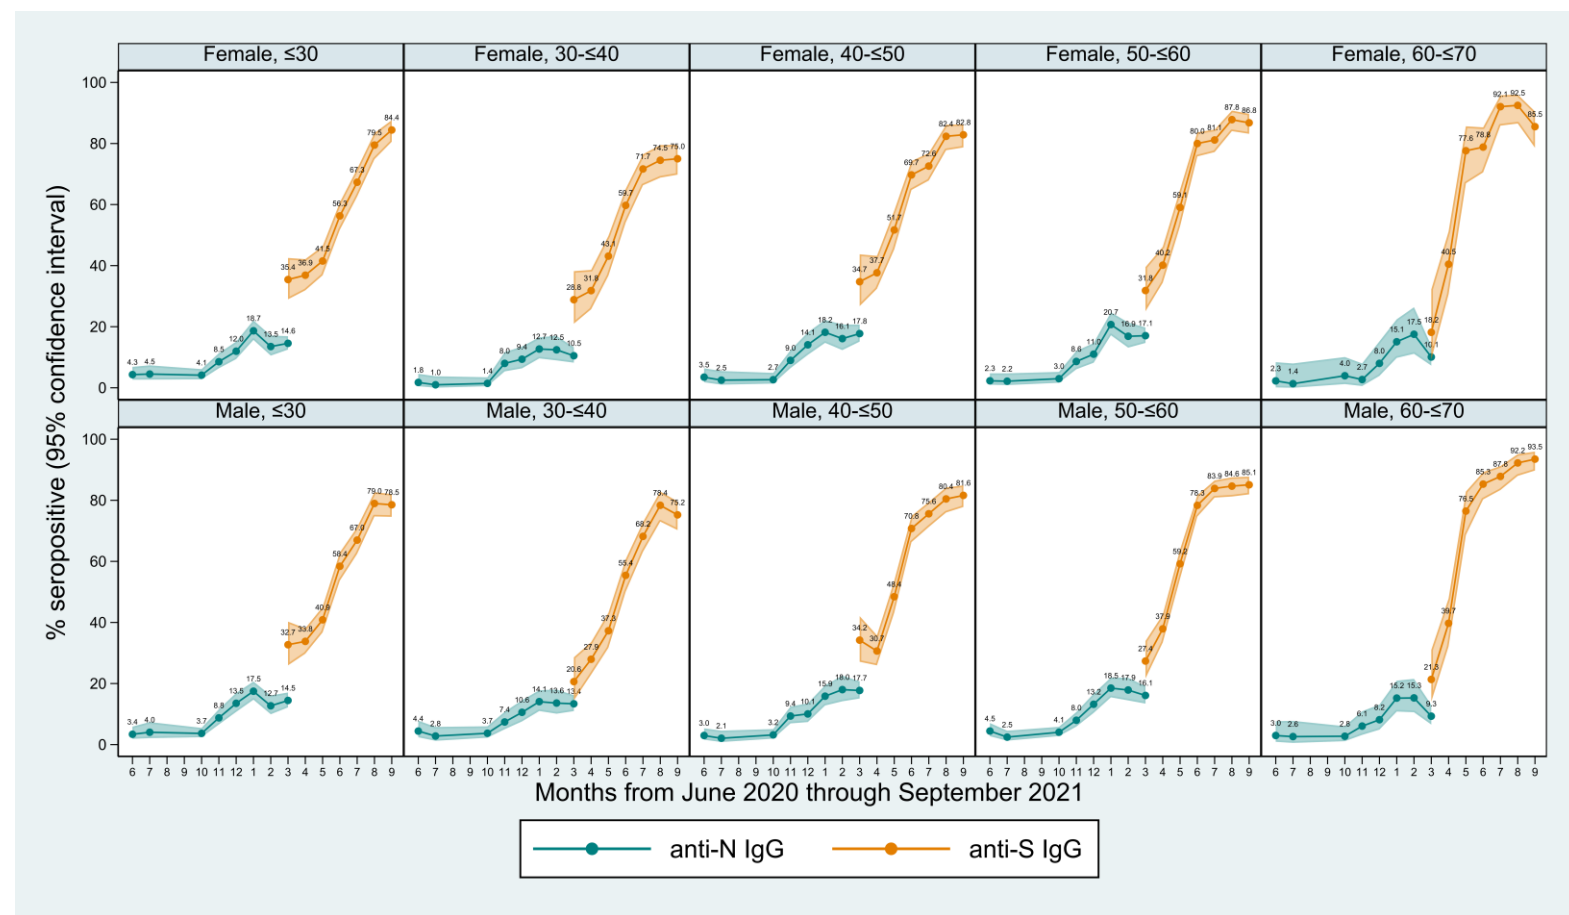

**Figure S3. Seroprevalence of anti-S IgG antibodies among unvaccinated and of anti-N IgG antibodies for different time periods and across different population subgroups, Tyrol, Austria, June 2020-September 2021 (n=35,193).**

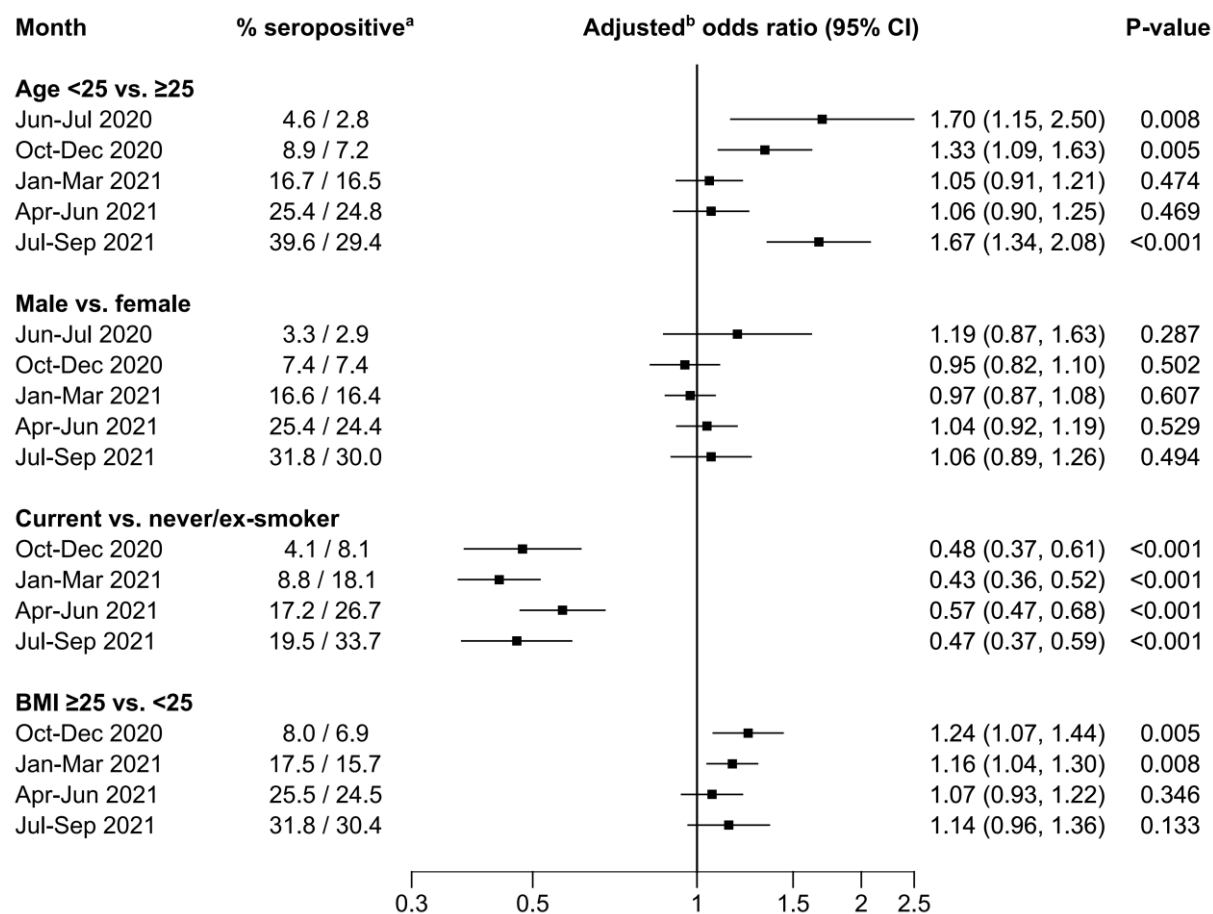

Abbreviations: BMI, body mass index; CI, confidence interval. <sup>a</sup>The reference group is depicted on the right side. <sup>b</sup>Adjusted for all the variables shown in this figure (age <25 vs. ≥25 years), male vs. female sex, current vs. never/ex-smoker, and body mass index (≥25 vs. <25 kg/m<sup>2</sup>)
